# Supplementary material for: Perioperative circulating tumor DNA enables the identification of patients with poor prognosis in upper tract urothelial carcinoma
Source: PubMed Central journal article supplement — Cancer Sci. 2022 Mar 24;113(5):1830–42. doi: 10.1111/cas.15334 (PMC9128184; doi:10.1111/cas.15334), 2022-03-24

## Supplementary Figure 2

Supervised consensus clustering and heatmap of mRNA expression data (BASE47) obtained from UTUC. BASE47 classified genes are listed on the right. ctDNA status and pathological T-stages are represented by horizontal bars.

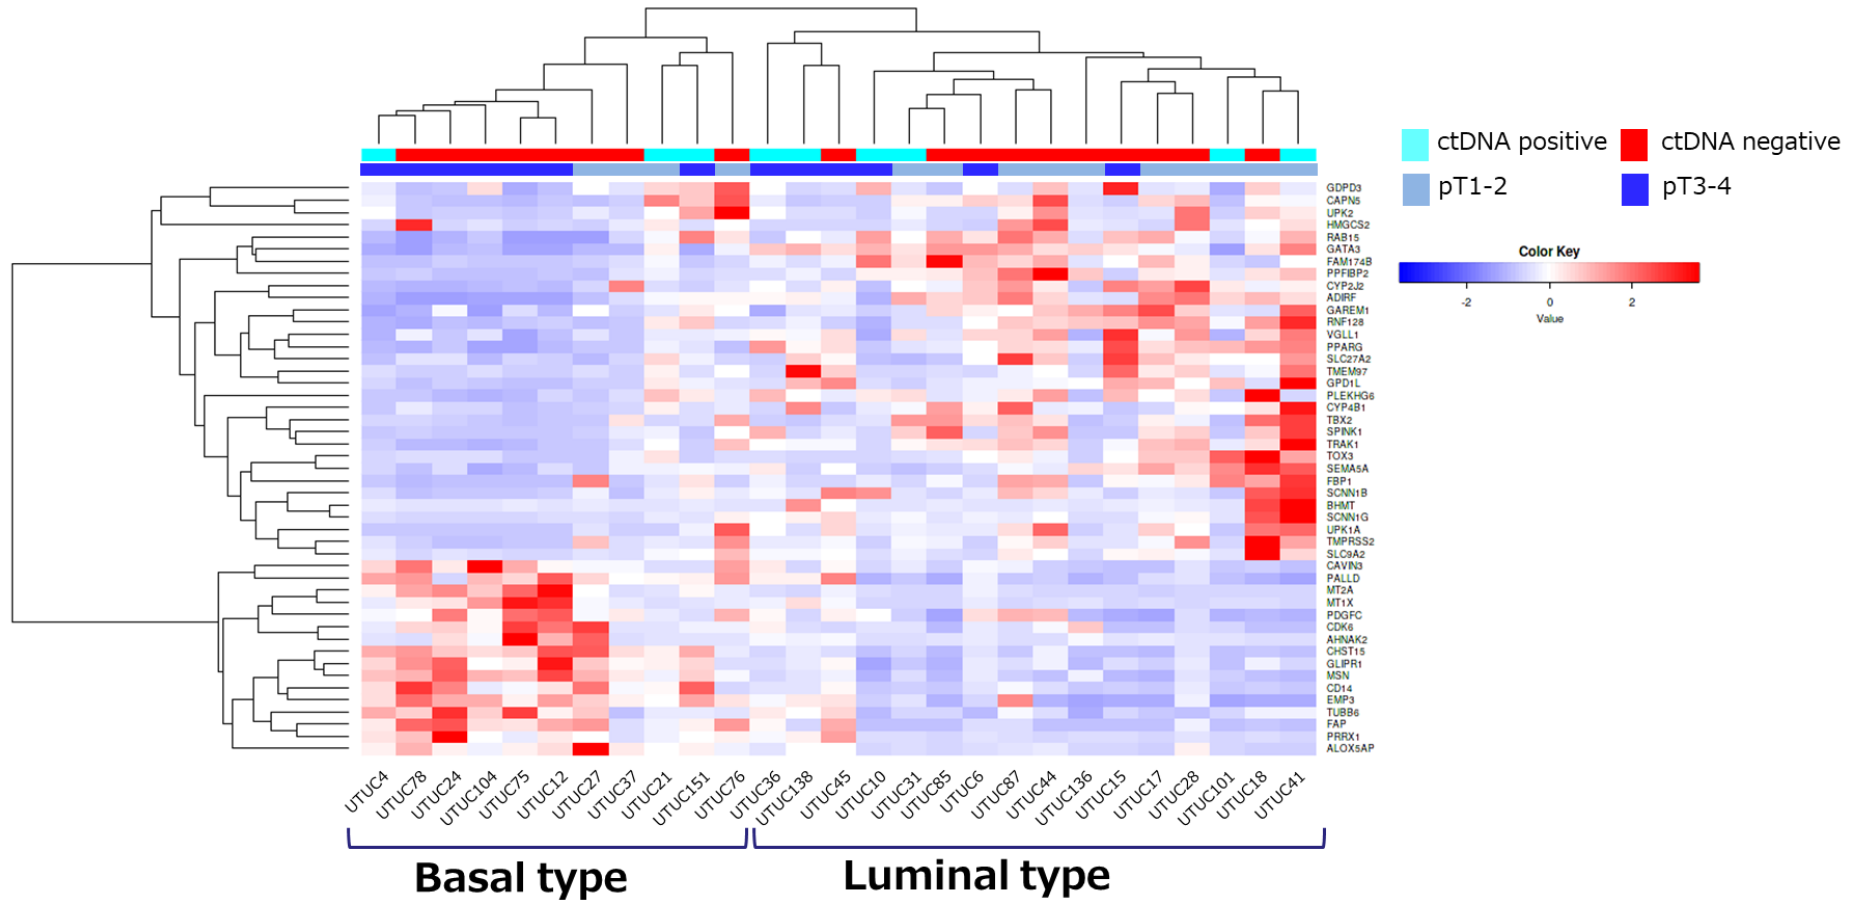

Supplement: CAS-113-1830-s001.pdf [file CAS-113-1830-s001.pdf]
