# Supplementary material for: Perioperative circulating tumor DNA enables the identification of patients with poor prognosis in upper tract urothelial carcinoma
Source: PubMed Central journal article supplement — Cancer Sci. 2022 Mar 24;113(5):1830–42. doi: 10.1111/cas.15334 (PMC9128184; doi:10.1111/cas.15334), 2022-03-24

## Supplementary Figure 1

The flowchart shows the decision criteria for negative, positive, and false-positive in ctDNA detection.

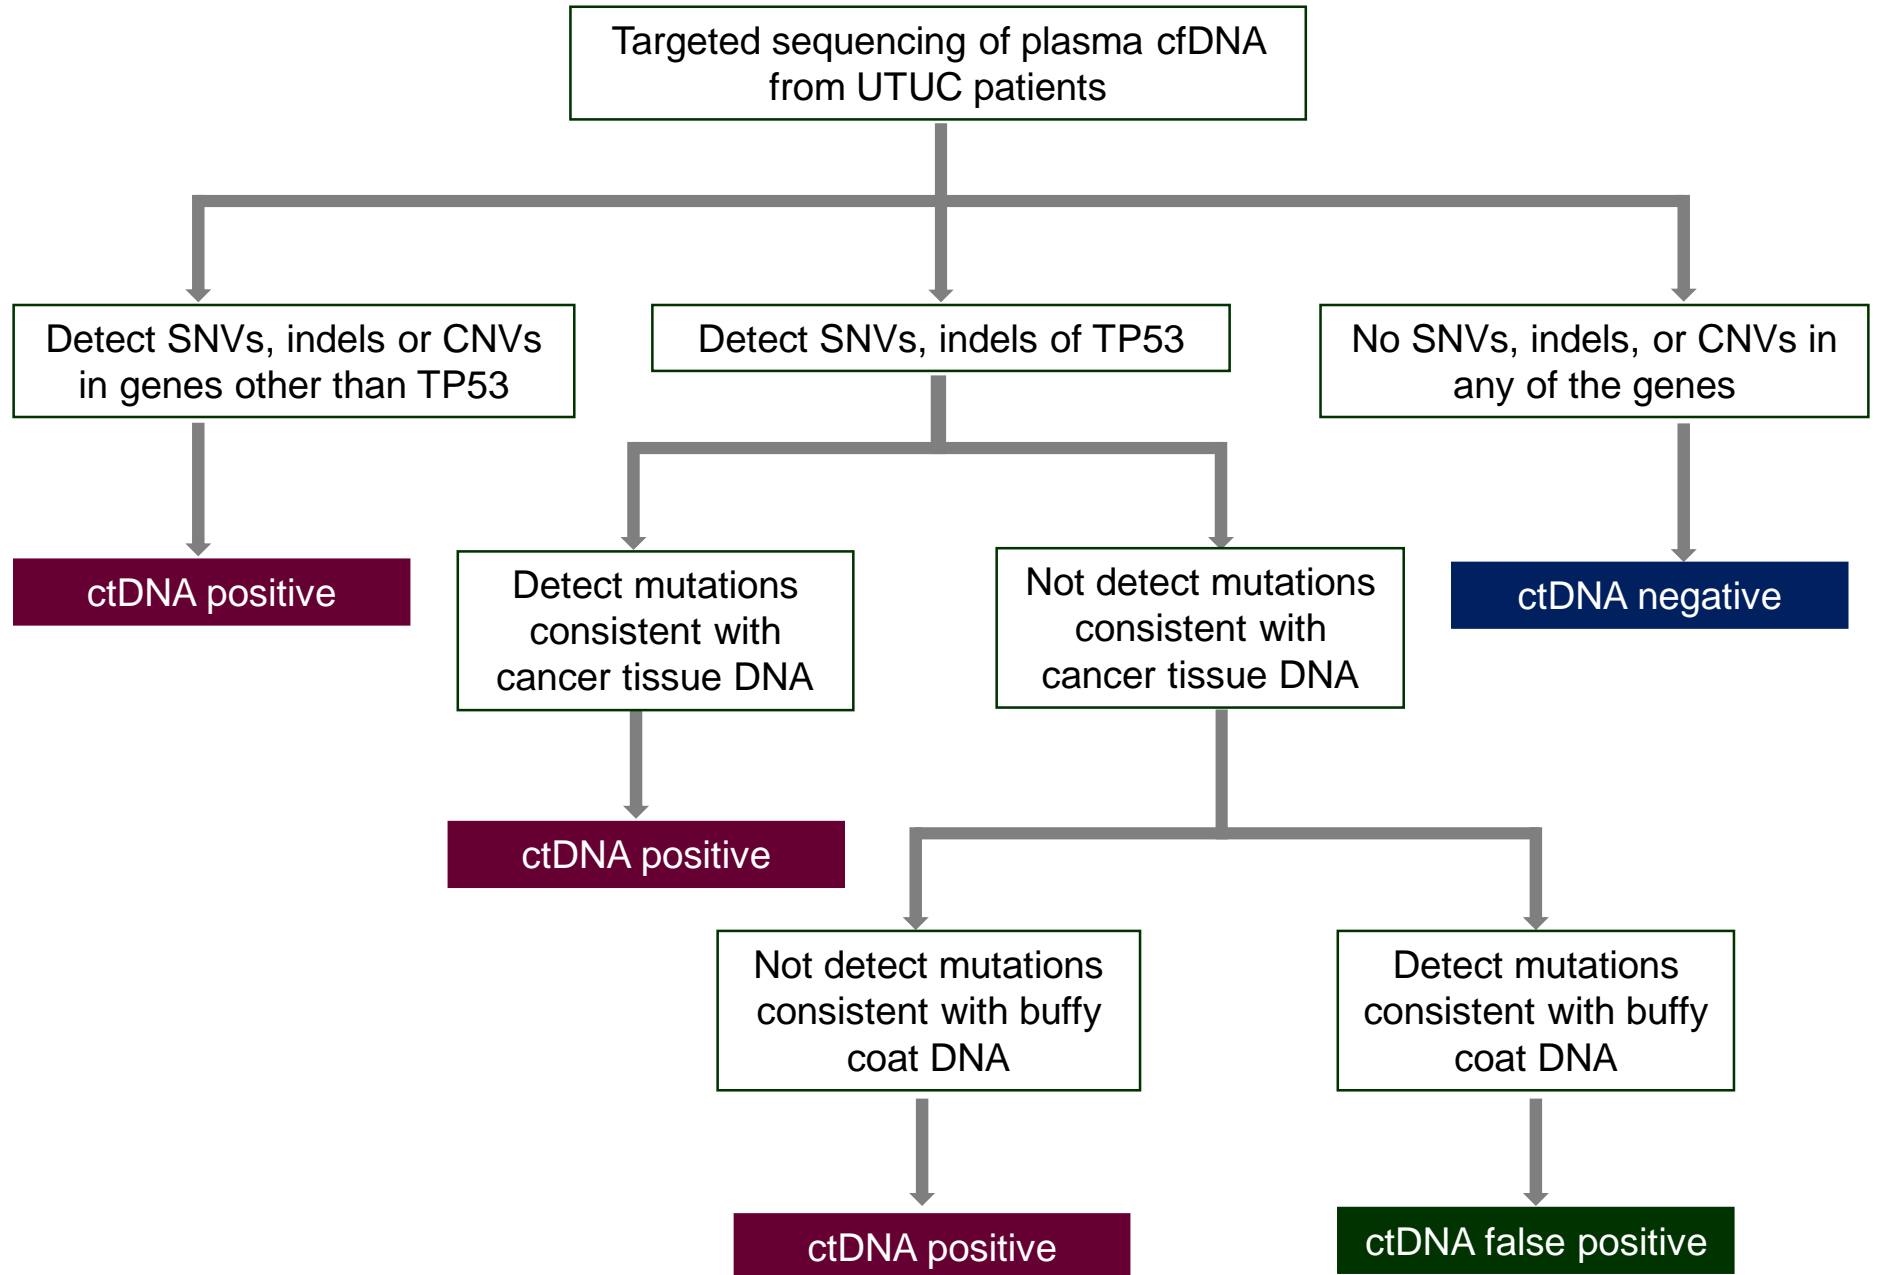

Supplement: CAS-113-1830-s002.pdf [file CAS-113-1830-s002.pdf]
