# Supplementary material for: Perioperative circulating tumor DNA enables the identification of patients with poor prognosis in upper tract urothelial carcinoma
Source: PubMed Central journal article supplement — Cancer Sci. 2022 Mar 24;113(5):1830–42. doi: 10.1111/cas.15334 (PMC9128184; doi:10.1111/cas.15334), 2022-03-24

### Supplementary Figure 3

Longitudinal monitoring of ctDNA levels during clinical disease course in metastatic UTUC patients

Individual swimmer plots for each patient showing the duration of treatment (n=7).

Horizontal lines represent the clinical course of each patient.

Circles represent ctDNA status (red and white circles mean positive and negative, respectively).

Red bars indicate progressive disease as evaluated by radiological images.

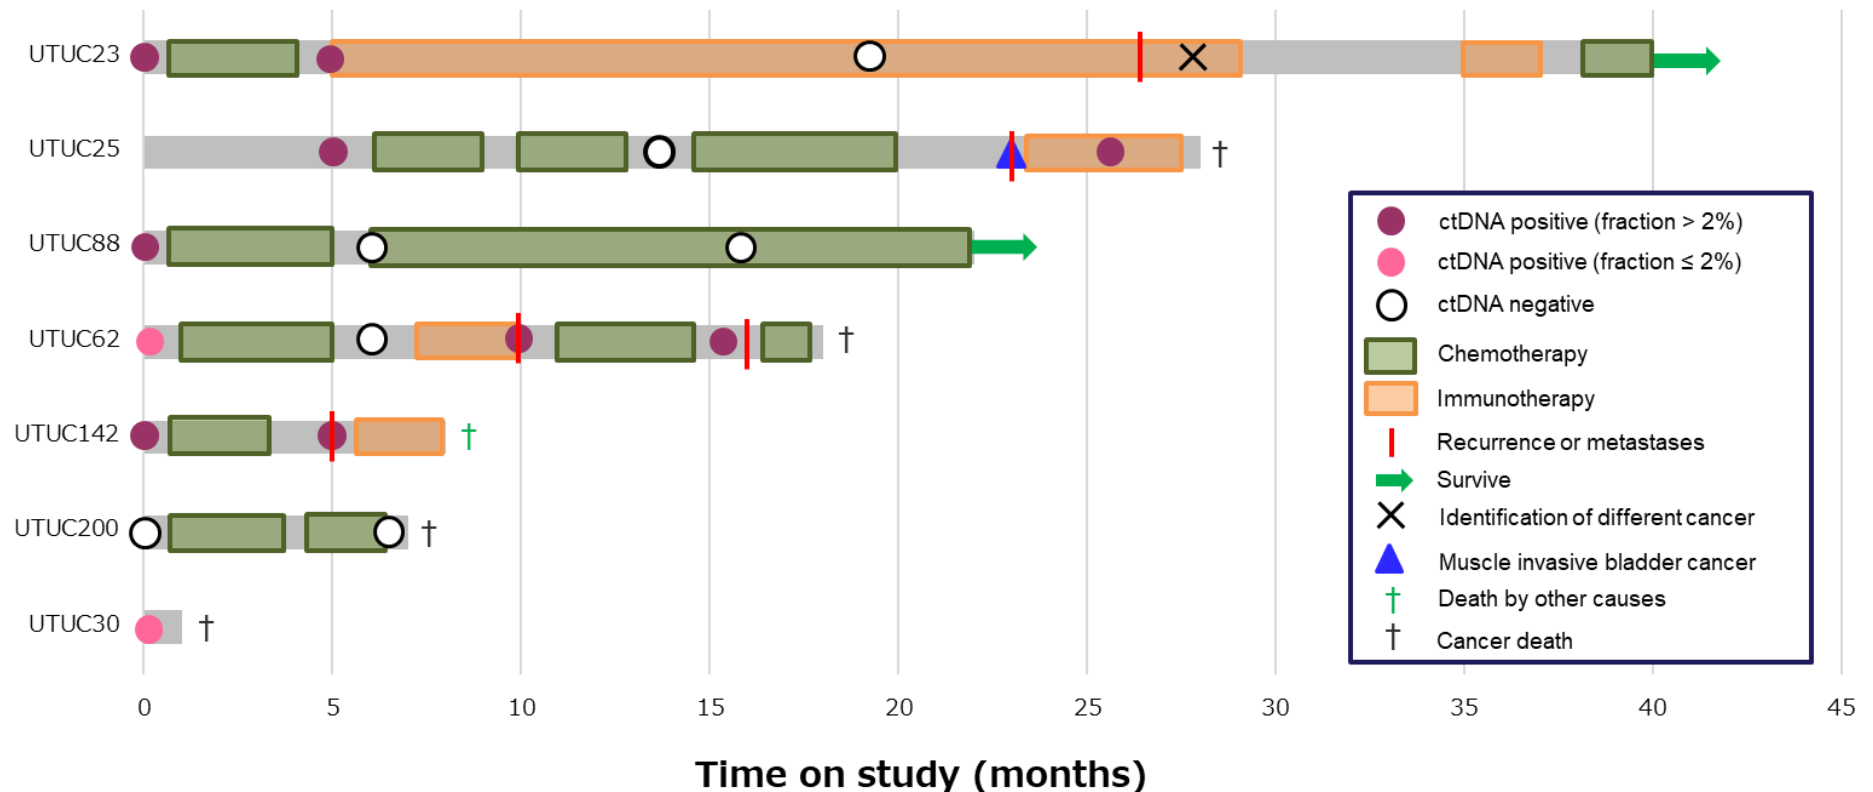

Supplement: CAS-113-1830-s003.pdf [file CAS-113-1830-s003.pdf]
